# Supplementary material
Source: publisher site journal article supplement (https://static.cambridge.org/content/id/urn:cambridge.org:id:article:S0899823X20002615/resource/name/S0899823X20002615supp002.docx)
Supplement: Supplementary file 1 [file S0899823X20002615supp002.docx]

**Supplemental figure 1. Number of antibiotic resistance genes detected in genomes from primary isolates compared to primary and secondary isolates from admission-positive patients whose secondary isolates are linked with high confidence (<10 SNVs) to primary isolates from themselves.** Y-axis indicates number of unique resistance genes detected with Kleborate (See methods, Supplementary table 1), X-axis indicates number of unique antibiotic resistance genes detected among primary (left) and primary and secondary isolates (right). Colors distinguish patients. Dashed lines indicate patients whose secondary isolate is within 10 SNVs of an isolate from a cohorted roommate.

**Supplemental figure 2. Patient bed traces showing patients with secondary isolates with putative transmission links <10 SNV to cohorted roommates.** Patients are indicated on the Y axis and time is on the X -axis, colors indicate room locations, circles indicate isolate collection dates for isolates with putative transmission links.
